# Supplementary material for: The impact of lysyl-phosphatidylglycerol on the interaction of daptomycin with model membranes
Source: Royal Society of Chemistry journal article supplement (doi:10.1039/d2ob01384c), 2022-01-01

## Supporting Information

### The Impact of Lysyl-phosphatidylglycerol on the Interaction of Daptomycin with Model Membranes.

Ryan Moreira and Scott D. Taylor\*

*Department of Chemistry, University of Waterloo, 200 University Ave. West, Waterloo, Ontario,  
Canada, N2L 3G1*

---

<sup>1</sup>H- <sup>13</sup>C- and <sup>31</sup>P-NMR spectra for compounds **2**, **4a**, **8-10** and lysyl-DMPG S2-16

---

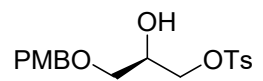

**8**  $^1\text{H}$  NMR

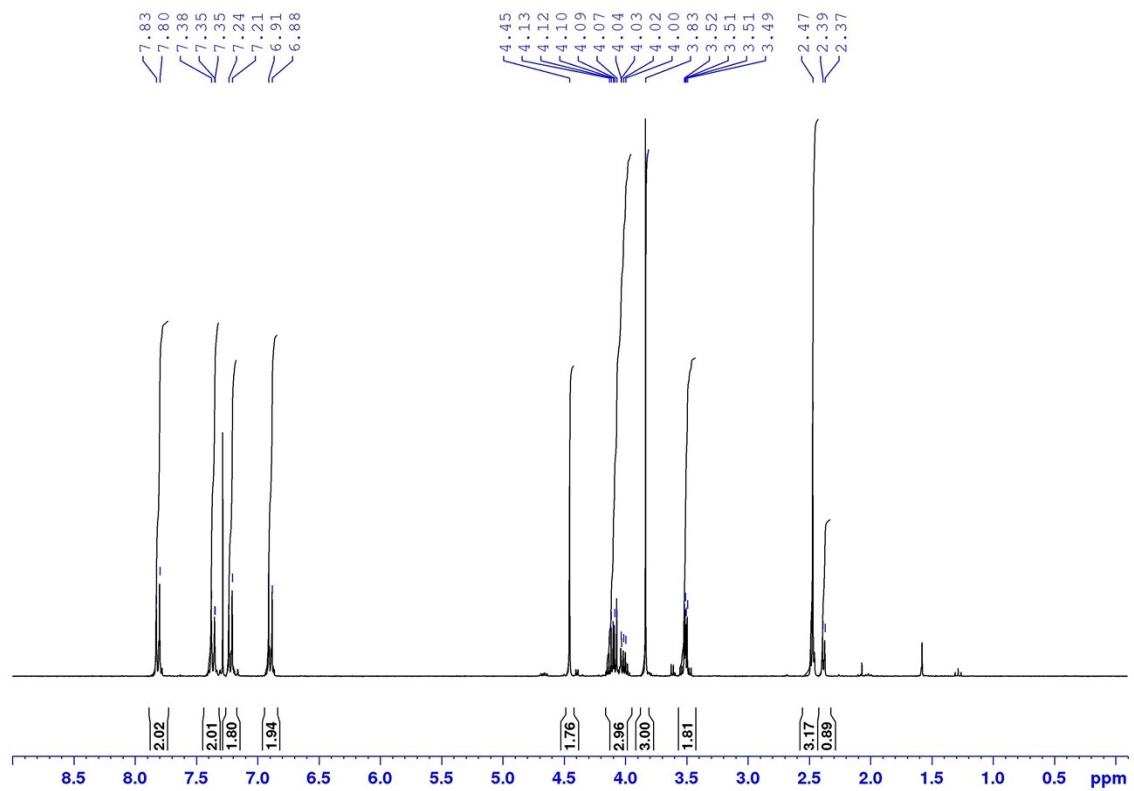

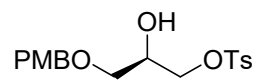

**8**  $^{13}\text{C}$  NMR

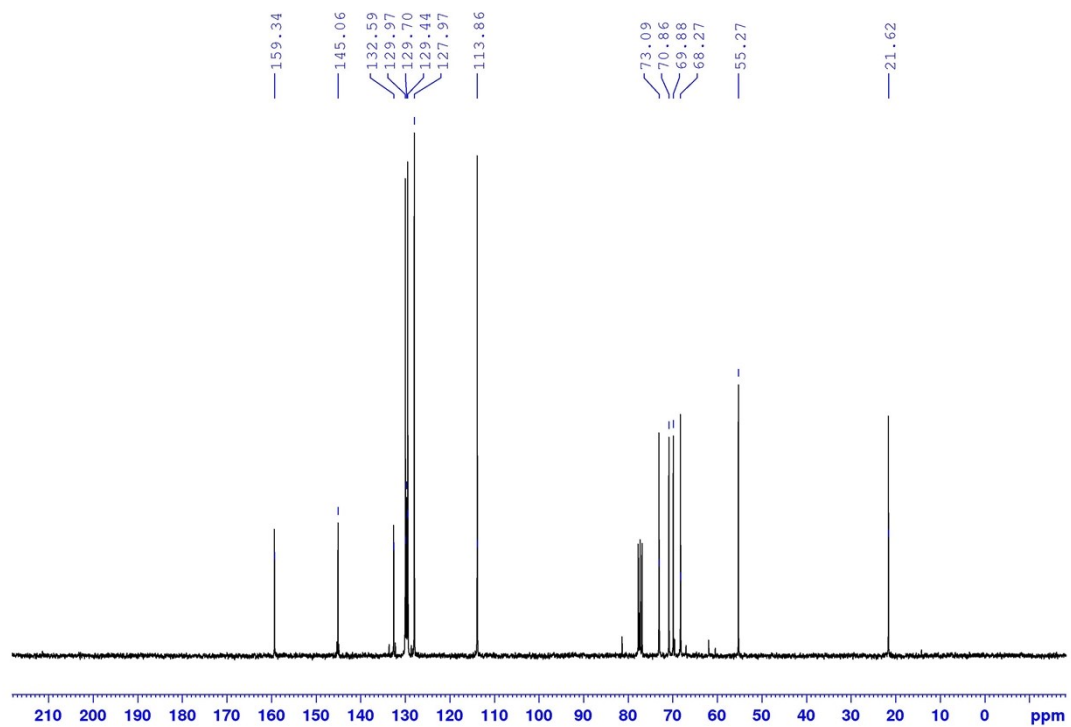

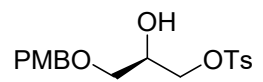

**8**  $^{13}\text{C}$  inversgated NMR

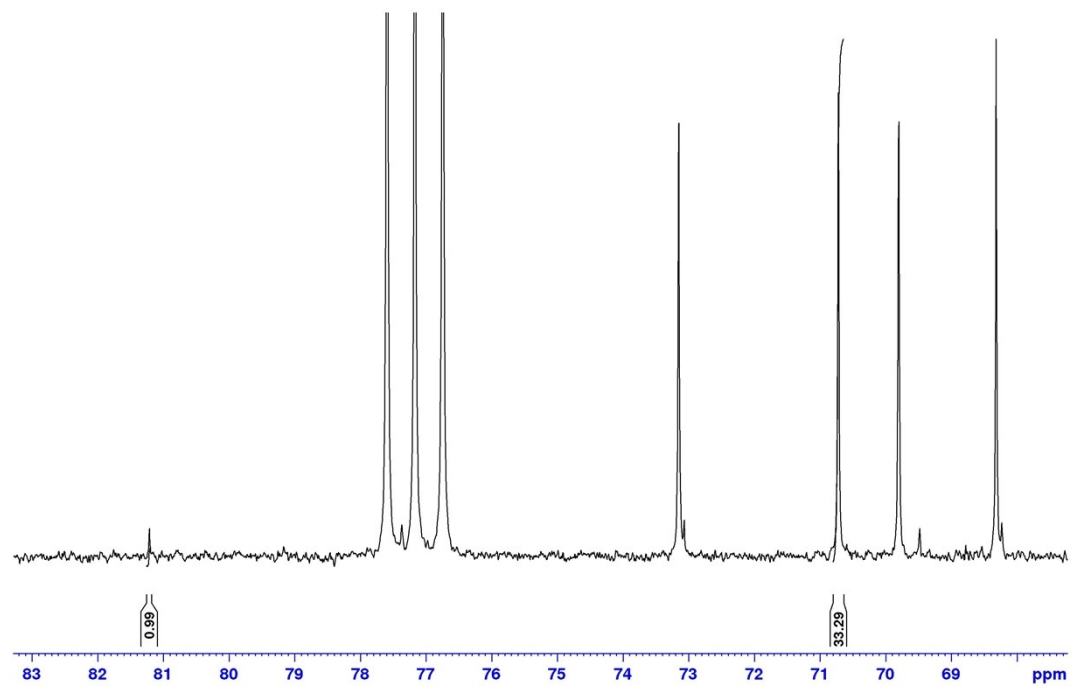

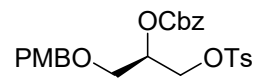

9 <sup>1</sup>H NMR

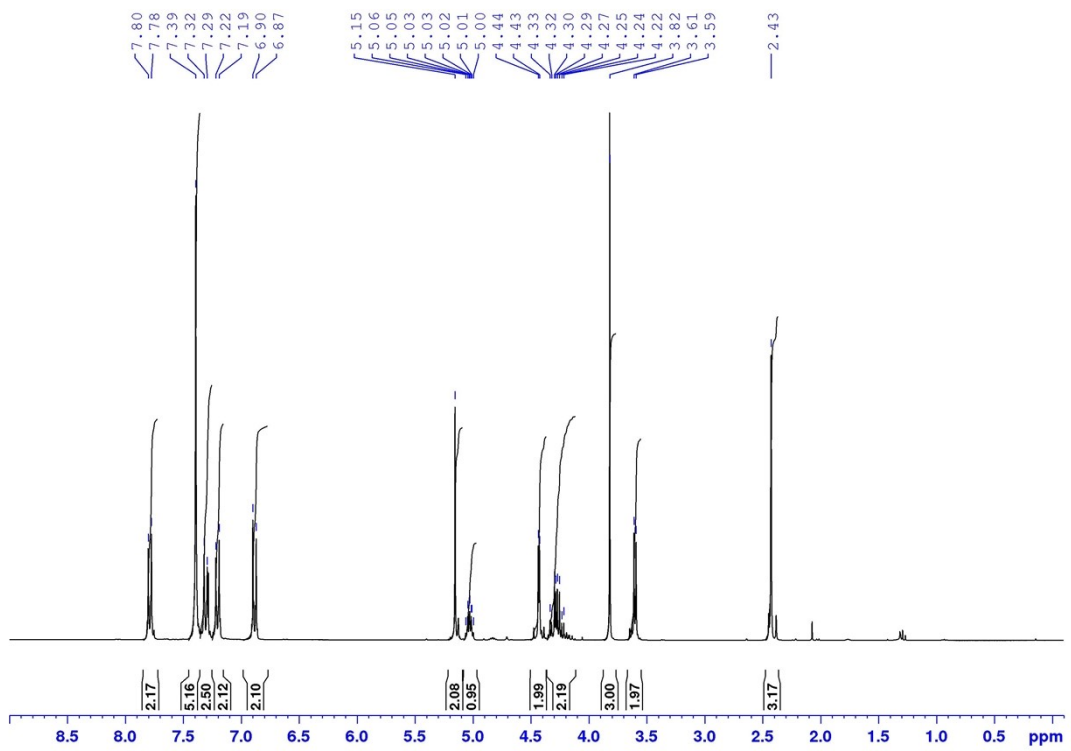



9  $^{13}\text{C}$  NMR

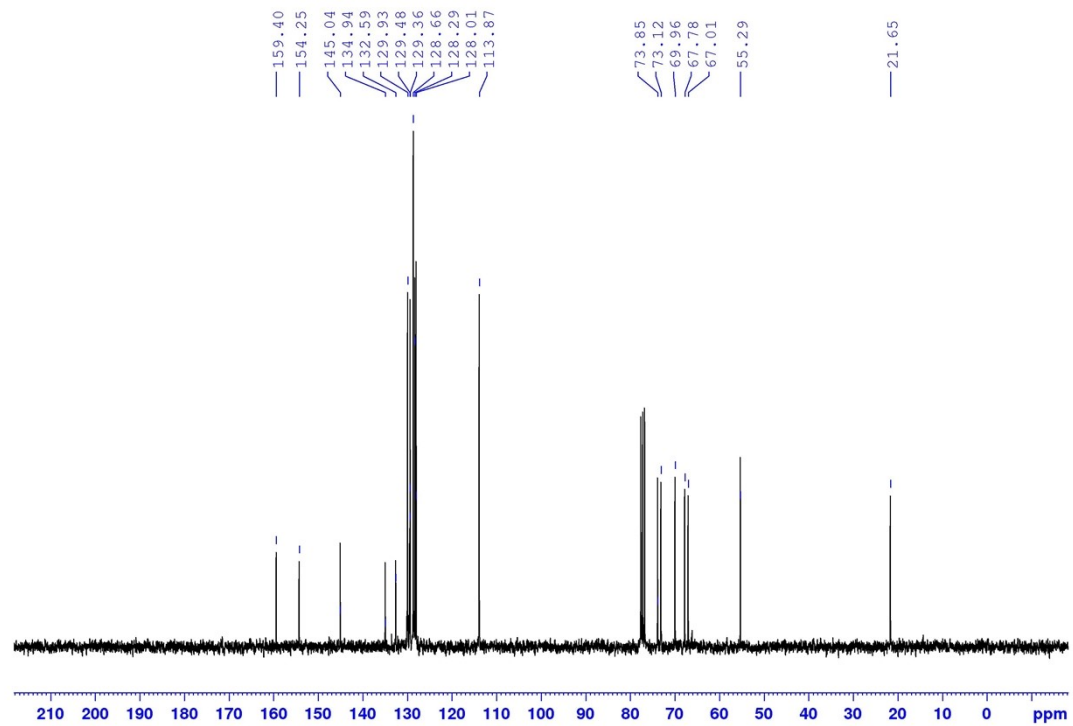

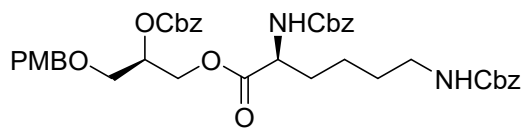

10 <sup>1</sup>H NMR

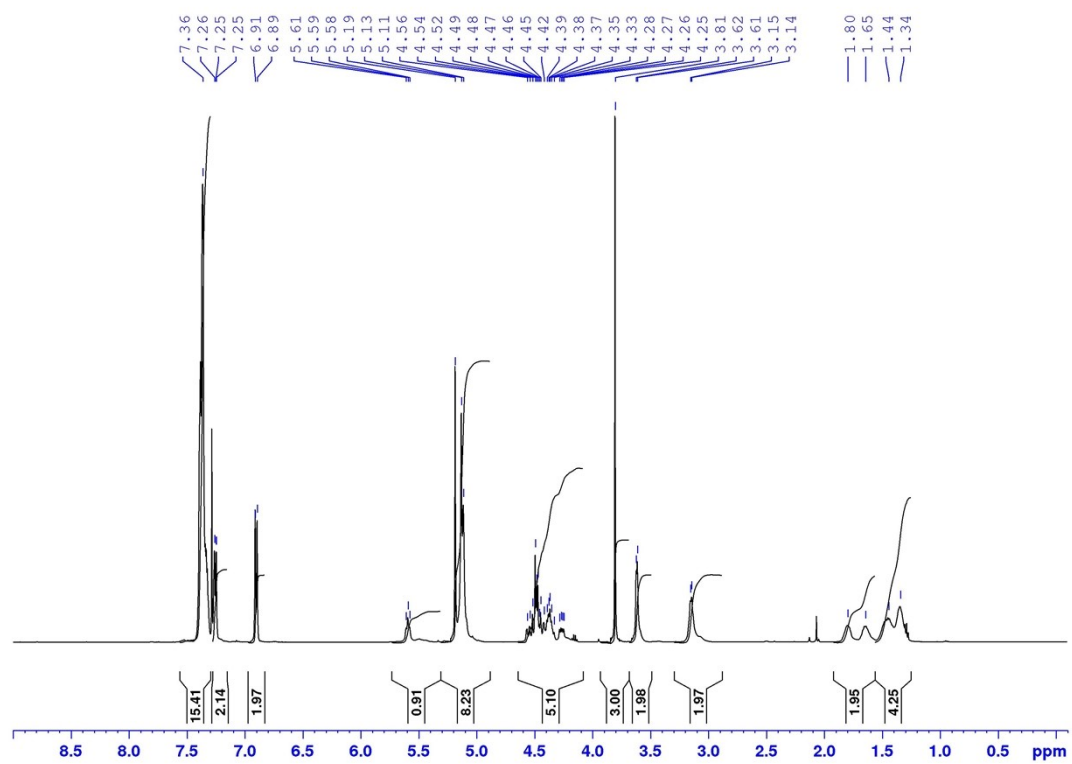



10 <sup>13</sup>C NMR

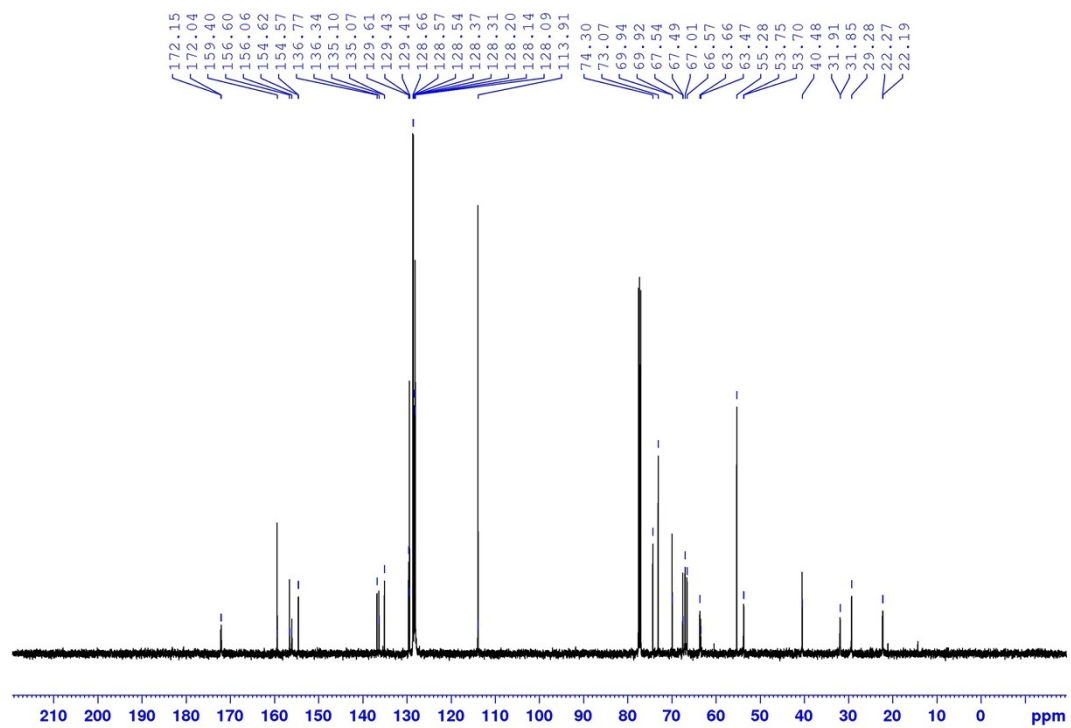



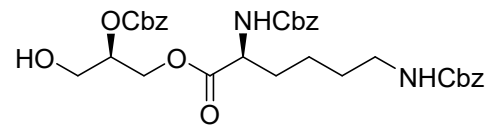

2 <sup>1</sup>H NMR

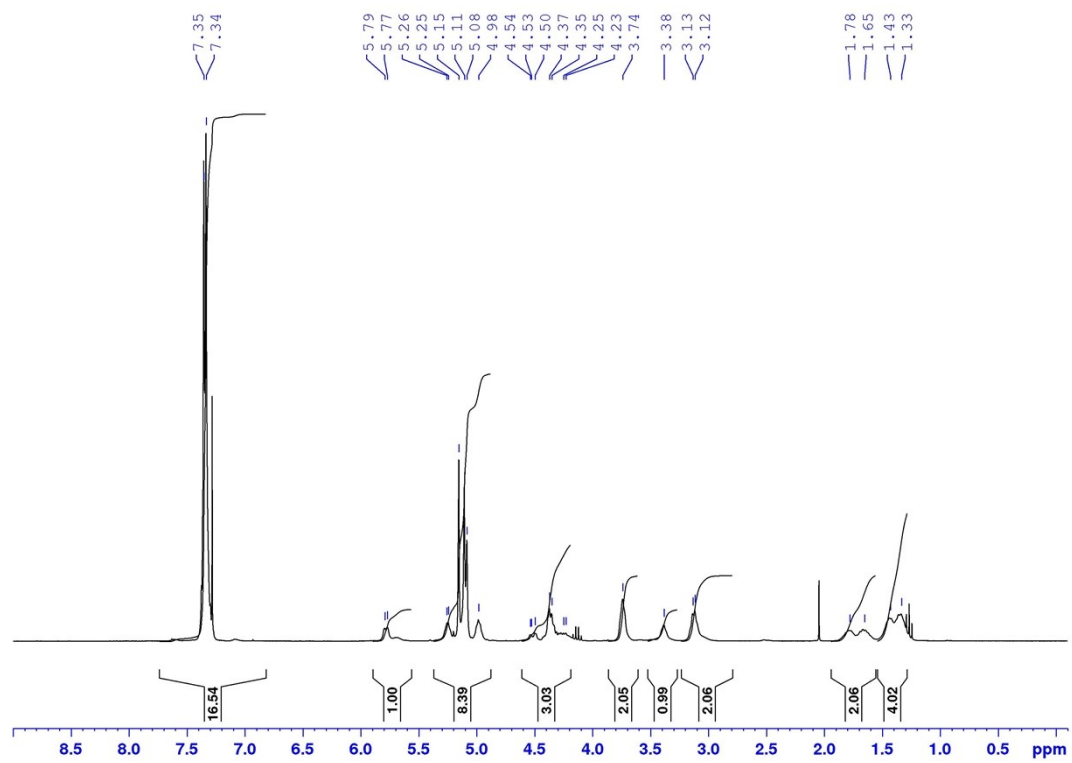

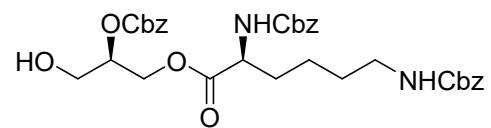

2 <sup>13</sup>C NMR

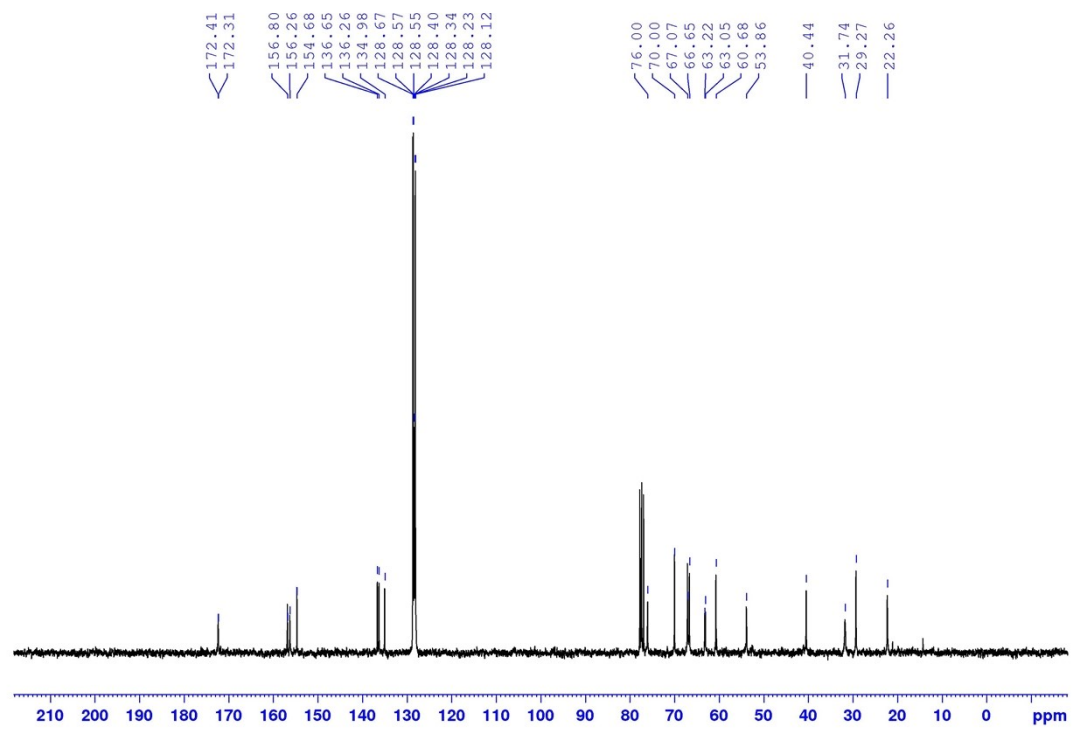

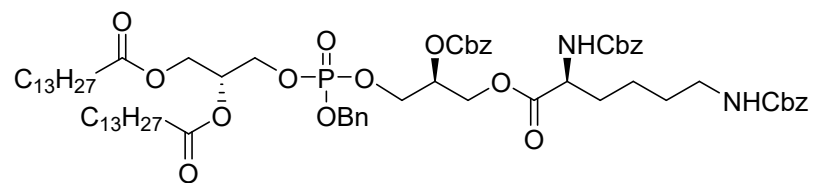

**10**  $^1\text{H}$  NMR

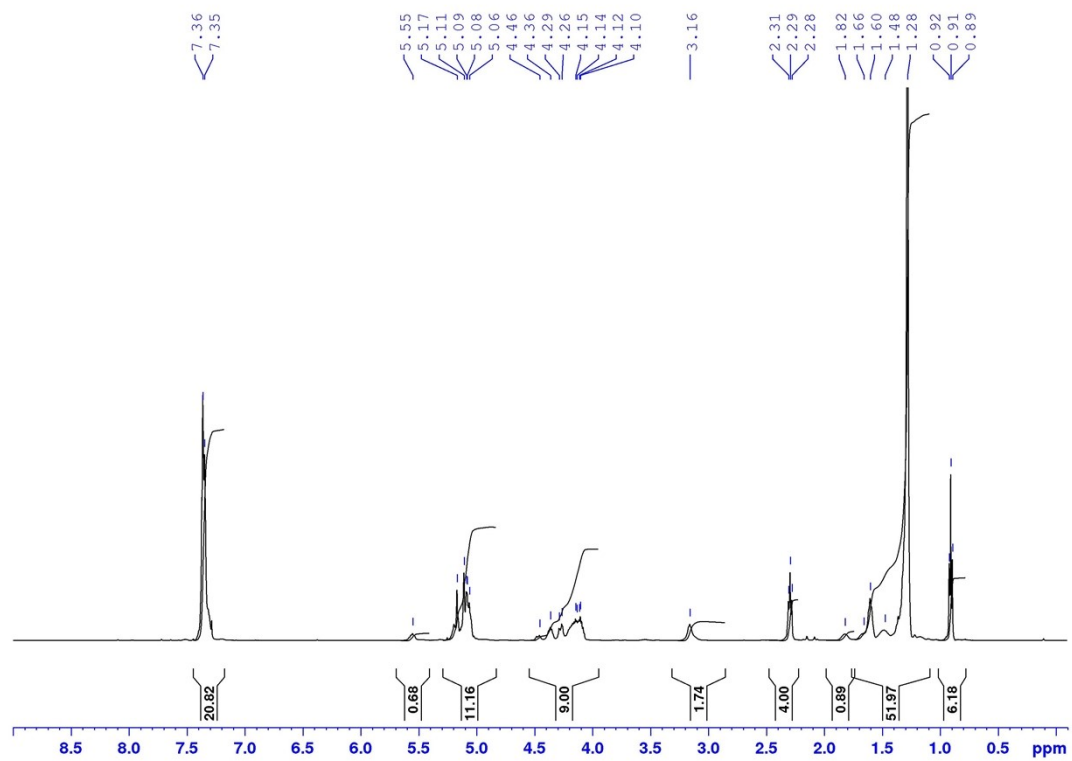

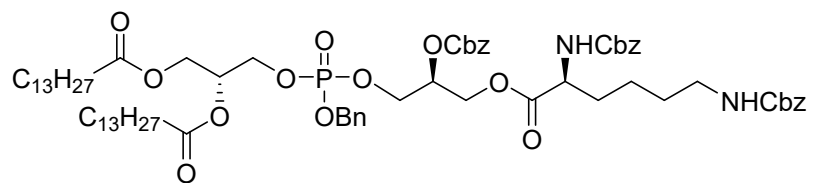

**10** <sup>13</sup>C NMR

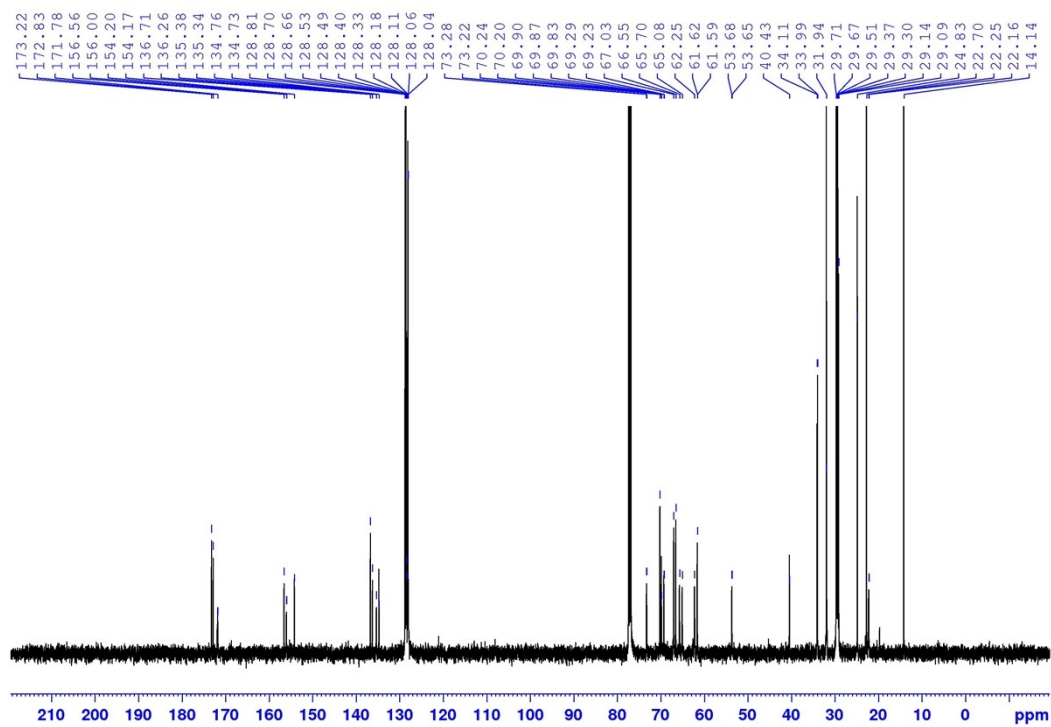

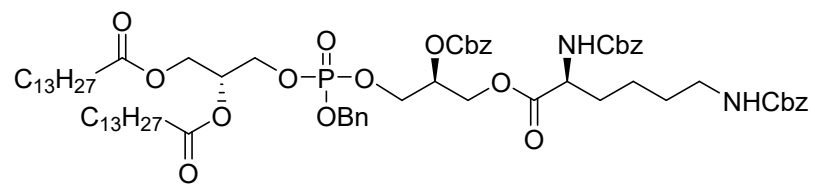

10 <sup>31</sup>P NMR

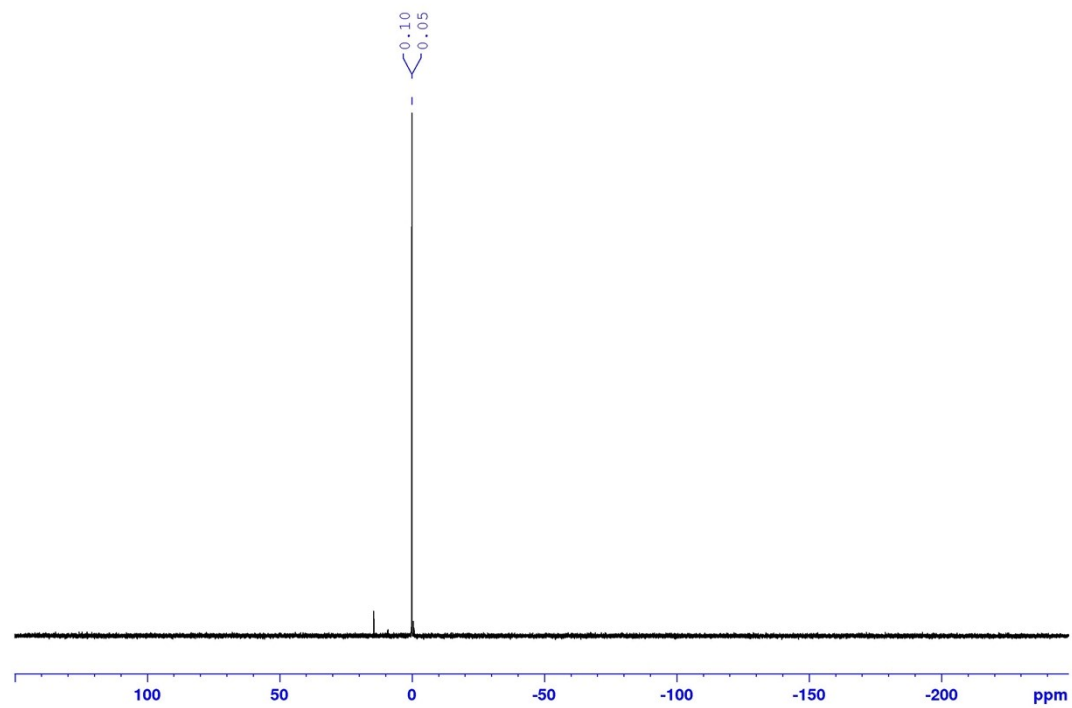

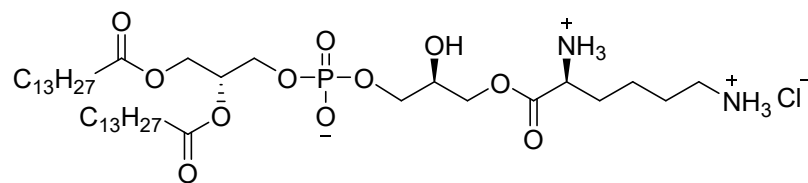

Lysyl-DMPG <sup>1</sup>H NMR

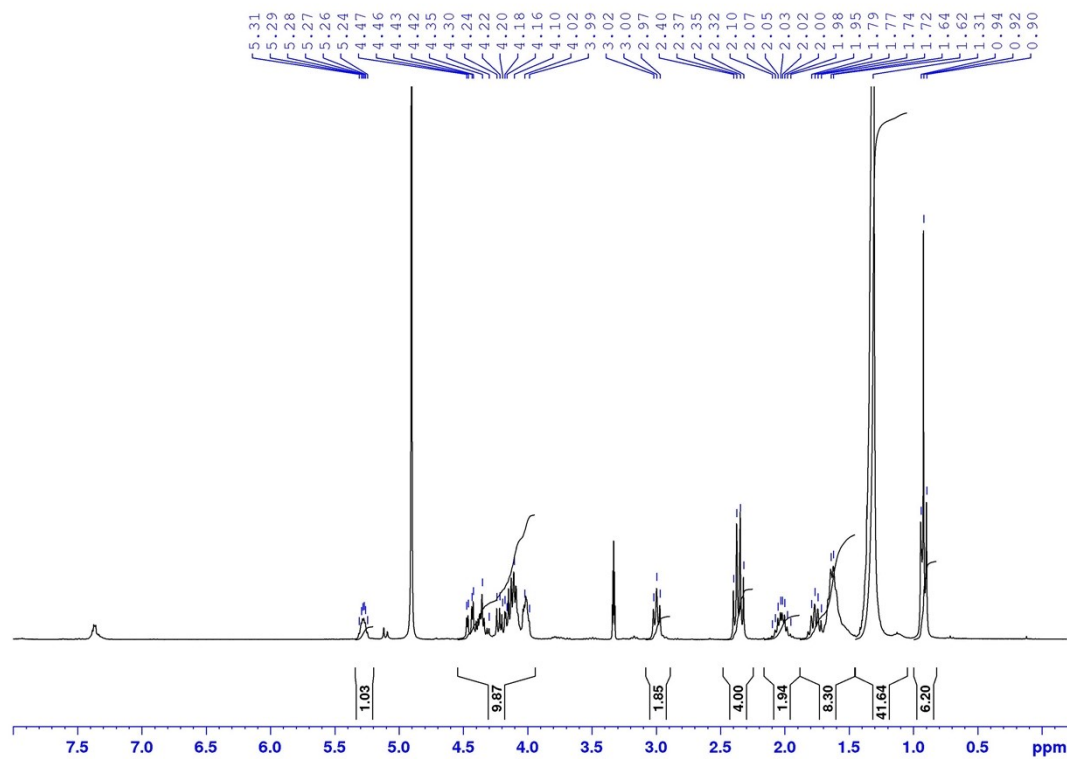

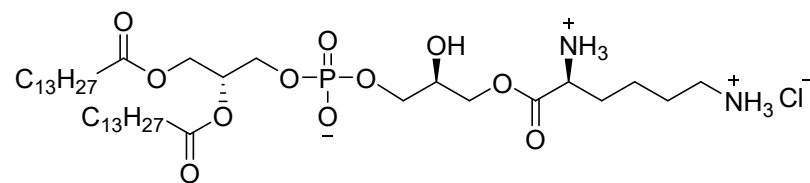

Lysyl-DMPG <sup>13</sup>C NMR

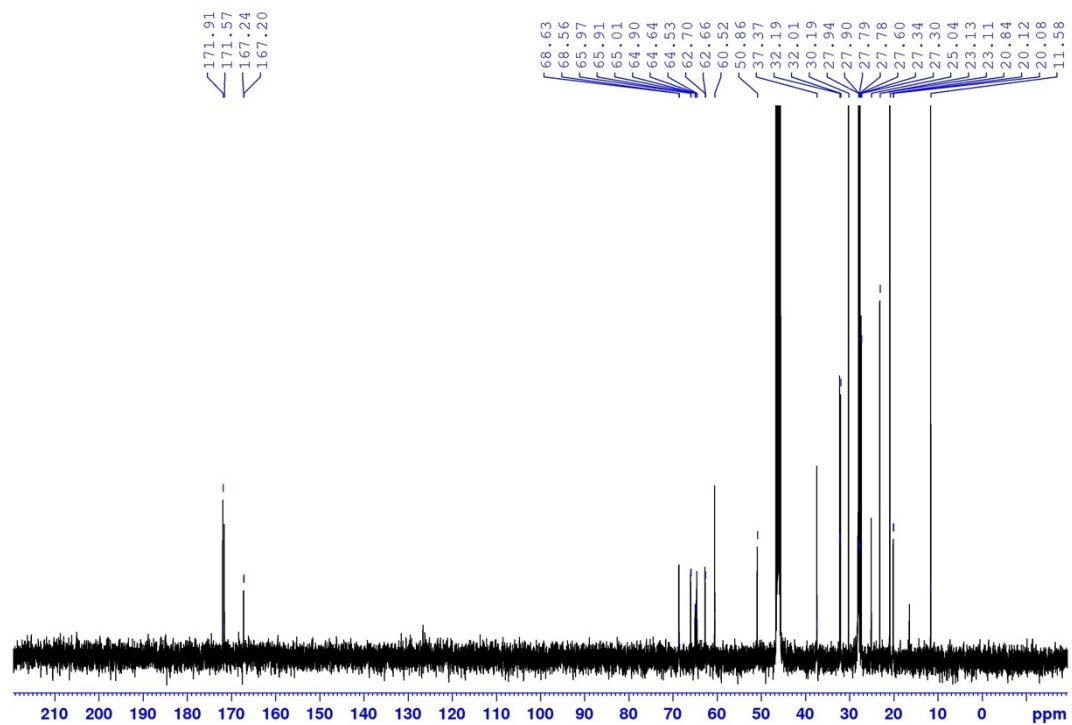



Lysyl-DMPG <sup>31</sup>P NMR

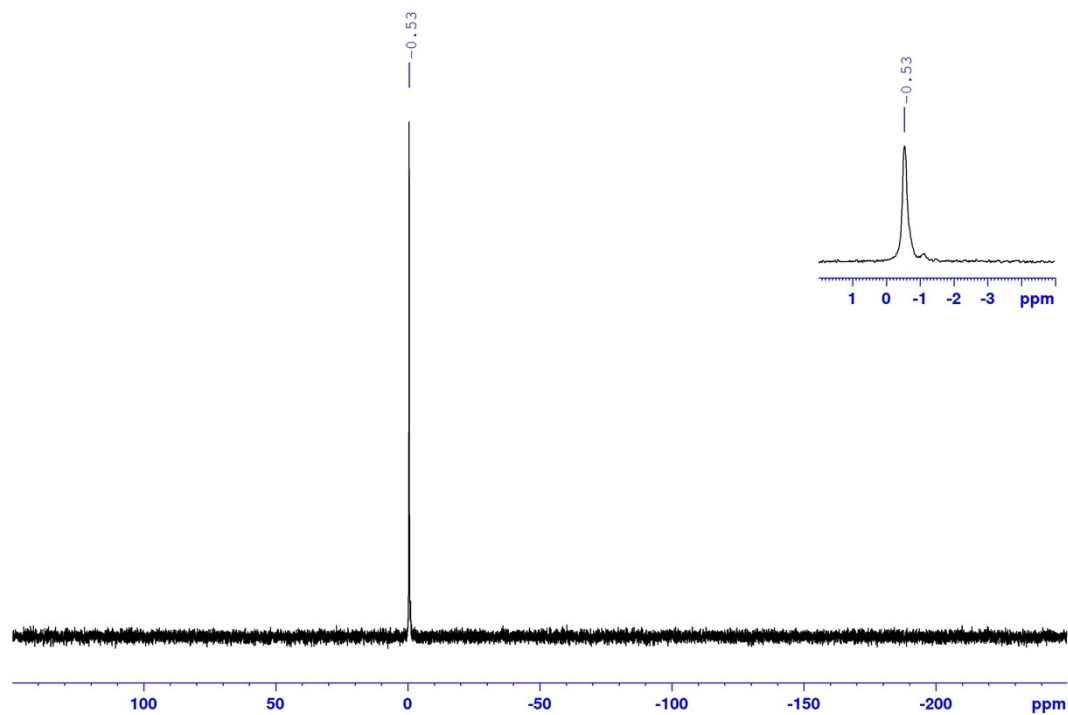

Supplement: d2ob01384c1.pdf [file d2ob01384c1.pdf]
